# Supplementary material
Source: publisher site journal article supplement (https://www.spandidos-publications.com/6846/downloadSupplementary)
Supplement: Supplementary file 1 [file downloadSupplementary]

## Sheet: STableIII Transcription Factors
Table SIII. List of the top 30 transcription factors found by MetaCore transcription regulation analysis of PSAT1-mediated DEGs.
#	Network	GO processes	Total nodes	Seed nodes	Pathways	P-value	zScore	gScore
1	GATA-1	cellular response to stress (21.3%; 4.181e-09), cellular process (93.6%; 8.177e-09), mitotic cell cycle (12.2%; 1.455e-08), mitotic cell cycle process (10.9%; 1.872e-08), response to organic substance (33.4%; 3.788e-08)	350	349	0	0	454.23	454.23
2	GATA-2	positive regulation of cellular process (50.2%; 3.810e-10), positive regulation of biological process (53.0%; 1.068e-09), regulation of localization (30.9%; 1.771e-09), regulation of locomotion (15.8%; 6.842e-09), response to stimulus (67.0%; 6.886e-09)	302	301	0	0	421.71	421.71
3	SOX17	cellular process (94.7%; 9.302e-09), tissue development (23.2%; 4.621e-08), response to stress (36.5%; 9.212e-08), DNA-dependent DNA replication (5.7%; 9.381e-08), mitotic cell cycle process (11.4%; 1.139e-07)	279	278	0	0	405.21	405.21
4	Esrra	positive regulation of cellular process (49.2%; 2.059e-08), positive regulation of biological process (51.6%; 1.062e-07), tissue development (22.8%; 1.729e-07), response to wounding (11.4%; 2.783e-07), response to stimulus (65.7%; 4.117e-07)	271	270	0	0	399.31	399.31
5	GCR	response to organic substance (41.3%; 4.588e-14), response to oxygen-containing compound (28.7%; 5.228e-12), regulation of localization (34.3%; 5.412e-12), positive regulation of cellular process (53.1%; 6.880e-12), positive regulation of biological process (56.3%; 9.721e-12)	270	269	0	0	398.56	398.56
6	HNF3-alpha	regulation of localization (34.7%; 5.638e-12), positive regulation of cellular process (52.1%; 2.022e-10), regulation of signaling (37.2%; 4.187e-10), positive regulation of biological process (55.0%; 4.570e-10), regulation of cell communication (36.8%; 6.896e-10)	269	268	0	0	397.82	397.82
7	TAL1	tissue development (22.1%; 8.150e-07), response to stimulus (64.4%; 3.606e-06), tube morphogenesis (11.5%; 4.040e-06), tube development (13.8%; 5.473e-06), mitotic cell cycle (11.1%; 1.269e-05)	267	266	0	0	396.33	396.33
8	FOXP3	regulation of localization (33.7%; 3.966e-11), positive regulation of cellular process (49.6%; 1.720e-08), tissue development (24.0%; 2.135e-08), cellular response to stress (22.4%; 3.198e-08), positive regulation of biological process (52.4%; 3.786e-08)	264	263	0	0	394.07	394.07
9	ETS1	mitotic cell cycle (16.5%; 1.162e-12), mitotic cell cycle process (14.9%; 3.380e-12), cell cycle (21.1%; 6.768e-12), DNA replication (9.1%; 8.987e-12), cell cycle process (17.8%; 1.158e-11)	264	263	0	0	394.07	394.07
10	AML1 (RUNX1)	cellular component organization or biogenesis (51.1%; 2.928e-09), response to organic substance (37.2%; 4.514e-09), cellular process (95.2%; 1.321e-08), cell cycle (18.6%; 1.571e-08), cellular component organization (48.5%; 3.723e-08)	245	244	0	0	379.51	379.51
11	SMAD1	response to organic substance (40.0%; 1.509e-11), tissue development (27.4%; 2.101e-11), response to stimulus (71.7%; 2.403e-11), cellular response to stimulus (61.7%; 4.006e-11), positive regulation of biological process (56.1%; 1.387e-10)	243	242	0	0	377.94	377.94
12	RBP-J kappa (CBF1)	regulation of programmed cell death (23.2%; 2.413e-09), regulation of cell death (24.6%; 3.214e-09), regulation of apoptotic process (22.8%; 3.310e-09), cell cycle (19.3%; 3.418e-09), mitotic cell cycle (14.5%; 3.668e-09)	239	238	0	0	374.79	374.79
13	Esrrg	positive regulation of cellular process (50.3%; 1.636e-07), response to stimulus (68.0%; 3.200e-07), positive regulation of biological process (52.8%; 4.960e-07), regulation of catalytic activity (27.4%; 5.255e-07), regulation of molecular function (32.5%; 6.624e-07)	209	208	0	0	350.25	350.25
14	E2F1	cell cycle (27.9%; 2.287e-18), mitotic cell cycle (21.3%; 2.822e-17), cell cycle process (22.3%; 1.416e-15), mitotic cell cycle process (18.3%; 5.479e-15), DNA replication (11.7%; 1.453e-14)	207	207	0	0	350.25	350.25
15	c-Myc	cellular process (99.0%; 9.075e-14), cell cycle (23.4%; 1.667e-12), cellular metabolic process (64.5%; 2.709e-12), cellular macromolecule metabolic process (49.2%; 6.134e-12), primary metabolic process (62.9%; 1.133e-11)	208	207	0	0	349.4	349.4
16	Oct-3/4	positive regulation of cellular process (54.8%; 6.925e-10), developmental process (57.6%; 1.237e-09), response to stress (42.4%; 1.599e-09), multicellular organism development (52.0%; 2.750e-09), system development (48.0%; 2.876e-09)	185	184	0	0	329.31	329.31
17	CREB1	regulation of cell cycle (23.3%; 3.077e-11), cell cycle (22.1%; 7.727e-10), cellular component organization or biogenesis (53.5%; 8.646e-09), mitotic cell cycle (15.7%; 1.667e-08), cell cycle process (17.4%; 2.267e-08)	180	179	0	0	324.78	324.78
18	SOX2	tissue development (32.0%; 4.719e-13), cellular response to stimulus (66.3%; 5.000e-12), response to stress (45.3%; 1.402e-11), response to stimulus (75.0%; 2.510e-11), negative regulation of biological process (55.8%; 6.832e-11)	179	178	0	0	323.86	323.86
19	GABP alpha	cellular component organization or biogenesis (56.9%; 3.879e-10), mitotic cell cycle (17.6%; 1.212e-09), mitotic cell cycle process (15.7%; 4.655e-09), cellular component organization (53.6%; 9.074e-09), regulation of macromolecule biosynthetic process (41.8%; 1.368e-08)	163	162	0	0	308.87	308.87
20	c-Maf	positive regulation of biological process (64.4%; 1.135e-12), positive regulation of cellular process (61.0%; 1.396e-12), regulation of localization (41.1%; 1.989e-12), negative regulation of biological process (59.6%; 4.496e-12), regulation of signaling (45.2%; 5.092e-12)	156	155	0	0	302.08	302.08
21	NANOG	positive regulation of cellular process (62.4%; 5.778e-14), tissue development (33.6%; 6.874e-13), positive regulation of biological process (63.8%; 2.023e-12), positive regulation of molecular function (30.2%; 4.209e-12), positive regulation of catalytic activity (25.5%; 7.908e-12)	154	153	0	0	300.11	300.11
22	LMO2	response to stimulus (68.4%; 1.654e-05), tissue development (24.1%; 3.146e-05), localization (48.1%; 3.863e-05), establishment of localization (40.6%; 4.662e-05), regulation of signaling (34.6%; 6.078e-05)	145	144	0	0	291.09	291.09
23	TCF8	tissue development (33.3%; 2.092e-11), regulation of cellular component movement (24.2%; 3.955e-11), negative regulation of cellular process (54.5%; 3.656e-10), regulation of locomotion (22.7%; 4.000e-10), regulation of cell motility (22.0%; 5.699e-10)	142	141	0	0	288.02	288.02
24	NRF1	positive regulation of cellular process (56.5%; 1.243e-08), negative regulation of cellular process (51.9%; 1.679e-08), mitotic cell cycle (16.8%; 1.023e-07), mitotic cell cycle process (15.3%; 1.402e-07), response to organic substance (40.5%; 1.865e-07)	140	139	0	0	285.95	285.95
25	TCF7L2 (TCF4)	regulation of localization (40.9%; 6.797e-11), regulation of signal transduction (40.2%; 2.213e-09), regulation of cell communication (41.7%; 1.461e-08), regulation of signaling (41.7%; 1.886e-08), cell communication (56.7%; 3.325e-08)	134	133	0	0	279.66	279.66
26	ASH2	positive regulation of cellular process (62.0%; 2.494e-11), negative regulation of cellular process (55.4%; 6.277e-10), positive regulation of biological process (62.8%; 8.823e-10), regulation of apoptotic process (28.9%; 1.844e-09), regulation of programmed cell death (28.9%; 3.223e-09)	129	128	0	0	274.32	274.32
27	HNF4-alpha	positive regulation of cellular process (62.3%; 1.288e-11), positive regulation of biological process (65.6%; 1.335e-11), regulation of localization (41.0%; 1.507e-10), cellular component organization or biogenesis (59.8%; 4.285e-10), regulation of cellular component organization (36.9%; 5.534e-10)	127	126	0	0	272.15	272.15
28	RelA (p65 NF-kB subunit)	response to lipid (31.9%; 6.959e-15), response to organic substance (52.9%; 7.152e-15), response to chemical (63.0%; 9.882e-15), regulation of cell population proliferation (37.8%; 1.238e-14), positive regulation of biological process (69.7%; 2.937e-14)	126	125	0	0	271.05	271.05
29	Androgen receptor	regulation of cell death (37.8%; 1.153e-14), negative regulation of cellular process (62.2%; 2.571e-14), regulation of apoptotic process (34.5%; 1.328e-13), regulation of programmed cell death (34.5%; 2.685e-13), negative regulation of biological process (63.9%; 6.995e-13)	125	124	0	0	269.96	269.96
30	TCF7L1 (TCF3)	positive regulation of cellular process (64.7%; 1.162e-12), regulation of cell population proliferation (33.6%; 4.846e-11), tissue development (34.5%; 5.156e-11), positive regulation of biological process (64.7%; 1.575e-10), regulation of cell communication (45.7%; 2.885e-10)	122	122	0	0	268.85	268.85
